# Supplementary material for: Long-term efficacy and safety of oral semaglutide and the effect of switching from sitagliptin to oral semaglutide in patients with type 2 diabetes: a 52-week, randomized, open-label extension of the PIONEER 7 trial
Source: HighWire-hosted journal article supplement (doi:10.1136/bmjdrc-2020-001649), 2020-12-01
Supplement: bmjdrc-2020-001649supp001_data_supplement.pdf [file bmjdrc-2020-001649supp001_data_supplement.pdf]

---

## Supplemental Material

### **Long-term efficacy and safety of oral semaglutide, and the effect of switching from sitagliptin to oral semaglutide in patients with type 2 diabetes: a 52-week, randomized, open-label extension of the PIONEER 7 trial**

John B Buse, MD<sup>1</sup> Bruce W Bode, MD<sup>2</sup> Ann Mertens, PhD<sup>3</sup> Young Min Cho, MD<sup>4</sup> Erik Christiansen, MD<sup>5</sup> Christin L Hertz, MD<sup>5</sup> Morten A Nielsen, MSc<sup>5</sup> Thomas R Pieber, MD<sup>6</sup> for the PIONEER 7 investigators

---

## Table of contents

1. Estimands
  2. Statistical considerations
  3. **Online Supplemental Table 1** Additional glucose-lowering medication and rescue medication use
  4. **Online Supplemental Table 2** Supportive secondary endpoints not reported in the main text for the durability part
  5. **Online Supplemental Table 3** On-treatment adverse events by system organ class
  6. **Online Supplemental Table 4** On-treatment adverse events leading to premature trial product discontinuation
  7. **Online Supplemental Table 5** On-treatment hypoglycemic episodes
  8. **Online Supplemental Table 6** EAC-confirmed events, excluding malignant neoplasms
  9. **Online Supplemental Table 7** EAC-confirmed malignant neoplasms
  10. **Online Supplemental Table 8** In-trial diabetic retinopathy and related complications
  11. **Online Supplemental Table 9** Other safety assessments in the durability part
  12. **Online Supplemental Table 10** Supportive endpoints at week 104 not reported in the main text for switch part
  13. **Online Supplemental Table 11** Other safety assessments in the switch part (on-treatment)
  14. **Online Supplemental Figure 1** Trial design
  15. **Online Supplemental Figure 2** Patient disposition
  16. **Online Supplemental Figure 3** Oral semaglutide dose by week in the durability and switch parts
  17. **Online Supplemental Figure 4** Change from week 52 in Diabetes Treatment Satisfaction Questionnaire scores at week 104 in the switch part
  18. Trial Investigators
  19. Independent ethics committees/institutional review boards
-

## Estimands

According to International Council for Harmonisation (ICH) E9 (R1)\*, an estimand description consists of the treatment condition of interest (e.g. the intervention of interest) plus four other components: 1) population, 2) endpoint, 3) intercurrent events and how they are accounted for, and 4) population level summary. In the table below, the attributes are described for the two estimands in the PIONEER program. Two intercurrent events were considered: trial product discontinuation and initiation of rescue medication.

### The attributes of the two estimands according to ICH E9 (R1)\*

| Estimand         | Population              | Strategy for accounting for intercurrent events                                                                                                                                  | Endpoints – switch part                                                                                                                                                                                                                                                                                                                                                                                                                                                                           | Population level summary – switch part                            |
|------------------|-------------------------|----------------------------------------------------------------------------------------------------------------------------------------------------------------------------------|---------------------------------------------------------------------------------------------------------------------------------------------------------------------------------------------------------------------------------------------------------------------------------------------------------------------------------------------------------------------------------------------------------------------------------------------------------------------------------------------------|-------------------------------------------------------------------|
| Treatment policy | All randomized patients | Treatment policy strategy for both intercurrent events: <ul style="list-style-type: none"> <li>Trial product discontinuation</li> <li>Initiation of rescue medication</li> </ul> | Change from weeks 52 to 104 in: <ul style="list-style-type: none"> <li>HbA<sub>1c</sub>†</li> <li>Body weight (kg)†</li> <li>Fasting plasma glucose</li> <li>Body weight (%)</li> <li>Body mass index</li> <li>Waist circumference</li> <li>Amylase</li> <li>Lipase</li> <li>Pulse rate</li> <li>Systolic blood pressure</li> <li>Diastolic blood pressure</li> <li>Patient-reported outcomes (Diabetes Treatment Satisfaction Questionnaire, Short Form-36 version 2 (acute version))</li> </ul> | Mean difference between treatments in change from weeks 52 to 104 |
|                  |                         |                                                                                                                                                                                  | If a patient at week 104 achieves: <ul style="list-style-type: none"> <li>HbA<sub>1c</sub> &lt; 7.0%</li> <li>HbA<sub>1c</sub> ≤ 6.5%</li> <li>Weight loss ≥ 5% compared to week 52</li> <li>Composite endpoint: HbA<sub>1c</sub> &lt; 7.0% without severe or blood glucose-confirmed symptomatic hypoglycemia and no weight gain</li> </ul>                                                                                                                                                      | The odds ratio between treatments in reaching target              |
|                  |                         |                                                                                                                                                                                  | Time to additional glucose-lowering medication after week 52                                                                                                                                                                                                                                                                                                                                                                                                                                      | The hazard ratio between treatments                               |
| Trial product    | All randomized patients | Hypothetical strategy for both intercurrent events: <ul style="list-style-type: none"> <li>Trial product discontinuation</li> <li>Initiation of rescue medication</li> </ul>     | Change from baseline to week 104 in: <ul style="list-style-type: none"> <li>HbA<sub>1c</sub></li> <li>Body weight (kg)</li> <li>Fasting plasma glucose</li> <li>Body weight (%)</li> <li>Body mass index</li> </ul>                                                                                                                                                                                                                                                                               | Mean difference between treatments in change from weeks 52 to 104 |

| Estimand | Population | Strategy for accounting for intercurrent events | Endpoints – switch part                                                                                                                                                                                                                                                                                                                                 | Population level summary – switch part               |
|----------|------------|-------------------------------------------------|---------------------------------------------------------------------------------------------------------------------------------------------------------------------------------------------------------------------------------------------------------------------------------------------------------------------------------------------------------|------------------------------------------------------|
|          |            |                                                 | <ul style="list-style-type: none"> <li>• Waist circumference</li> <li>• Amylase</li> <li>• Lipase</li> <li>• Pulse rate</li> <li>• Systolic blood pressure</li> <li>• Diastolic blood pressure</li> <li>• Patient-reported outcomes (Diabetes Treatment Satisfaction Questionnaire, Short Form-36 version 2 (acute version))</li> </ul>                 |                                                      |
|          |            |                                                 | <p>If a patient at week 104 achieves:</p> <ul style="list-style-type: none"> <li>• HbA<sub>1c</sub> &lt;7.0%</li> <li>• HbA<sub>1c</sub> ≤6.5%</li> <li>• Weight loss ≥5% compared to week 52</li> <li>• Composite endpoint: HbA<sub>1c</sub> &lt;7.0% without severe or blood glucose-confirmed symptomatic hypoglycemia and no weight gain</li> </ul> | The odds ratio between treatments in reaching target |
|          |            |                                                 | Time to rescue medication                                                                                                                                                                                                                                                                                                                               | The hazard ratio between treatments                  |

\*International Council for Harmonisation of Technical Requirements for Pharmaceuticals for Human Use. Addendum on estimands and sensitivity analysis in clinical trials to the guideline on statistical principles for clinical trials E9 (R1). Final version, adopted on November 20, 2019. Available at: [https://database.ich.org/sites/default/files/E9-R1\\_Step4\\_Guideline\\_2019\\_1203.pdf](https://database.ich.org/sites/default/files/E9-R1_Step4_Guideline_2019_1203.pdf). (Accessed Jan 17, 2020).

†Confirmatory secondary endpoint at week 104.

HbA<sub>1c</sub>, glycated hemoglobin.

## Statistical considerations

A hierarchical closed-testing strategy was used to preserve the overall type-1 error rate in the strong sense at a nominal two-sided 5% significance level for the treatment policy estimand only. The statistical testing strategy was based on the principle that glycemic effect was to be established in terms of HbA<sub>1c</sub> superiority before testing for added benefits in terms of body weight superiority.

The first hypothesis to be tested was superiority on glycated hemoglobin (HbA<sub>1c</sub>) of oral semaglutide versus sitagliptin in the main phase. The hypothesis was tested at the overall significance level (5%), while allocating a 0% local significance level to the remaining hypotheses. If the hypothesis was confirmed, the significance level was reallocated as indicated by the arrows in the figure below. Each hypothesis was tested at its updated local significance level ( $\alpha$ -local) until all hypotheses had been confirmed or until no hypothesis could be confirmed.

As the two confirmatory hypotheses pertaining to the main phase of the trial were confirmed, the local significance level ( $\alpha$ -local) was reallocated to the two confirmatory hypotheses in the switch part as specified in the figure below.

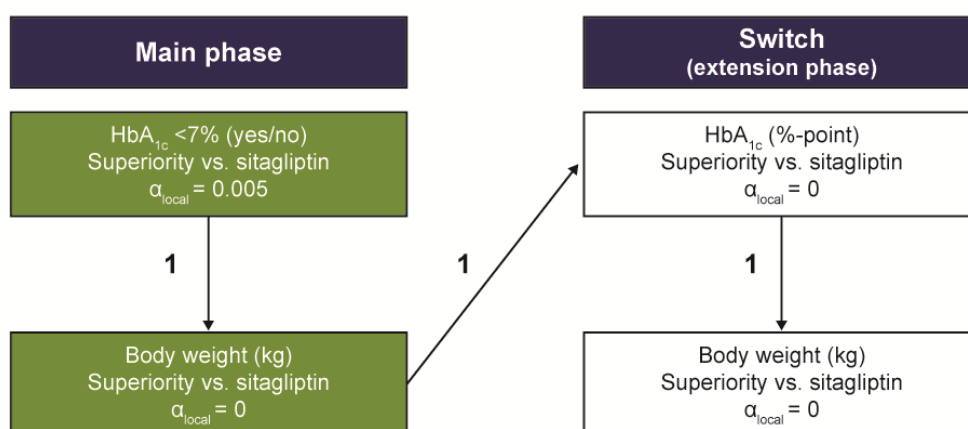

For the treatment policy estimand used in the switch part, the primary statistical analysis was based on a pattern mixture model using multiple imputation to impute missing data for week 104. It was assumed that the missing data mechanism was missing-at-random within the groups used for imputation. Missing data for week 104 were imputed within four groups of patients, depending on the treatment arm and treatment status. For this imputation approach, it was assumed that the distribution of missing data for patients in a specific treatment arm resembled the distribution of available data for other patients in the same treatment group and with the same treatment status at week 104.

Missing values for each group were imputed as follows:

- An analysis of covariance (ANCOVA) with region and stratification factors as categorical fixed effects and week 52 measurements as a covariate was fitted to observed values of the change from week 52 in HbA<sub>1c</sub> or body weight at week 104.
- The estimated parameters for location and dispersion were used to impute 1000 values for each subject with missing week 104 data based on region and stratification factors as categorical fixed effects and week 52 measurements as a covariate. Thus, 1000 complete datasets were generated including observed and imputed values.

---

Subsequently, the analysis was done as follows:

- An ANCOVA model with treatment, region, and stratification factors as fixed effects and week 52 measurements as a covariate was fitted for each of the imputed datasets.
- The resulting 1000 estimates and variances were combined using Rubin's rule,<sup>1</sup> and the estimated treatment difference between oral semaglutide and sitagliptin together with two-sided 95% confidence interval and two-sided p value for testing no difference are presented.

For the trial product estimand used in the switch part for the confirmatory secondary endpoints, the primary analysis was based on a mixed model for repeated measurements (MMRM) that accounts for the uncertainty pertaining to missing data. The MMRM approach assumes that data are missing-at-random. As dependent variables, the MMRM model includes all post-week 52 values collected at scheduled visits up to and including week 104. The independent effects were treatment, region, and stratification factors as categorical fixed effects and the week 52 measurements as covariate, all nested within visit. An unstructured covariance matrix was employed for measurements within the same subject, assuming that measurements from different patients were independent. A restricted maximum likelihood approach was used.

For the switch part, the supportive continuous secondary efficacy endpoints were analyzed using similar statistical model approaches as for the confirmatory secondary endpoints, with the associated week 52 response as a covariate.

For the switch part, supportive binary secondary efficacy endpoints were analyzed using a logistic regression model with treatment, region, and stratification factors as fixed effects and the associated week 52 measurements as a covariate. To account for missing data, multiple imputation was used. As an exception, the binary endpoint 'HbA<sub>1c</sub> <7.0% (53 mmol/mol) and no need for rescue medication after week 52' was only summarized descriptively.

For the switch part, the time to additional anti-diabetic medication/rescue medication endpoints were evaluated as specified below:

- Time to additional anti-diabetic medication (treatment policy estimand): time from rerandomization to initiation and/or intensification by a dose increase >20% of an additional anti-diabetic medication. Patients who had not initiated additional anti-diabetic medication were censored the day before the end-of-treatment visit (visit 19). The follow-up period was excluded, because some patients discontinued study drug at the end-of-treatment visit and might have needed additional glucose-lowering medication during the follow-up period. Patients who withdrew from the trial or were lost to follow-up were considered as having initiated an additional anti-diabetic medication.
- Time to rescue medication (trial product estimand): time from rerandomization to initiation and/or intensification of rescue medication. Patients who had not initiated rescue medication during the on-treatment period were censored one day before the last date on study drug.

The time-to-event endpoints were analyzed using a Cox proportional hazards model with treatment, region, and stratification factors as fixed effects and the week 52 HbA<sub>1c</sub> measurements as a covariate.

The safety evaluation was primarily based on the on-treatment observation period, except for deaths and adverse event types with potentially long latency between onset and diagnosis, for which the in-trial observation period was used.

In-trial observation period:

- Durability part: starts at the date of randomization (visit 2) in the main phase; switch part: starts at the date of rerandomization (visit 10) in the extension phase.
  - Includes the period after initiation of rescue medication and/or premature study drug discontinuation, if any.
-

**On-treatment observation period:**

- Durability: starts at the date of first dose of study drug in the main phase; switch: starts at the date of first dose of rerandomized study drug in the extension phase.
- Includes the period after initiation of rescue medication, if any.
- Excludes the period after premature study drug discontinuation, if any.

**On-treatment without rescue medication observation period:**

- Durability: starts at the date of first dose of study drug in the main phase; switch: starts at the date of first dose of rerandomized study drug in the extension phase.
- Excludes the period after initiation of rescue medication and/or premature study drug discontinuation, if any.

The trial sample size was calculated to ensure at least 90% power to confirm superiority of oral semaglutide versus sitagliptin for the primary endpoint (treatment policy estimand) of the main phase of the trial, with planned enrolment of 500 patients and random assignment to treatment to ensure this power was achieved. It was assumed that there would be an absolute difference in proportions of 15% and that the proportion of sitagliptin responders was distributed around 20–50%. Assumptions used in the sample size and power calculation for the main phase and extension phase (switch) are shown in the table below.

| Endpoint                              | Assumptions          |                    | Power calculation  |                |                   |
|---------------------------------------|----------------------|--------------------|--------------------|----------------|-------------------|
|                                       | Treatment effect     | Standard deviation | Number of subjects | Marginal power | Conditional power |
| <b>Main phase</b>                     |                      |                    |                    |                |                   |
| HbA <sub>1c</sub> <7.0% (yes/no)      | 15%-point difference |                    | 500                | 90%            | 90%               |
| Change in body weight (kg)            | 2.5                  | 4.0                | 500                | >99%           | 90%               |
| <b>Extension phase (switch)</b>       |                      |                    |                    |                |                   |
| Change in HbA <sub>1c</sub> (%-point) | 0.4                  | 1.1                | 190                | 49%            | 44%               |
| Change in body weight (kg)            | 2.5                  | 4.0                | 190                | 91%            | 40%               |

1. Little RJA, Rubin DB. Statistical analysis with missing data. New York, NY: John Wiley & Sons 1987.

**Online Supplemental Table 1** Additional glucose-lowering medication and rescue medication use

|                              | <b>Durability* (weeks 0 to 104)</b>              |                             | <b>Switch† (weeks 52 to 104)</b>                 |                             |                                                  |                             |
|------------------------------|--------------------------------------------------|-----------------------------|--------------------------------------------------|-----------------------------|--------------------------------------------------|-----------------------------|
|                              | <b>Oral semaglutide (n=253)</b>                  |                             | <b>Oral semaglutide (n=100)</b>                  |                             | <b>Sitagliptin (n=98)</b>                        |                             |
|                              | Additional glucose-lowering medication‡<br>n (%) | Rescue medication‡<br>n (%) | Additional glucose-lowering medication‡<br>n (%) | Rescue medication‡<br>n (%) | Additional glucose-lowering medication‡<br>n (%) | Rescue medication‡<br>n (%) |
| Any                          | 46 (18.2)                                        | 25 (9.9)                    | 15 (15.0)                                        | 9 (9.0)                     | 26 (26.5)                                        | 23 (23.5)                   |
| Sulfonylureas                | 15 (5.9)                                         | 10 (4.0)                    | 7 (7.0)                                          | 5 (5.0)                     | 10 (10.2)                                        | 10 (10.2)                   |
| SGLT-2 inhibitors            | 12 (4.7)                                         | 8 (3.2)                     | 3 (3.0)                                          | 2 (2.0)                     | 10 (10.2)                                        | 10 (10.2)                   |
| DPP-4 inhibitors             | 10 (4.0)                                         | 0                           | 4 (4.0)                                          | 0                           | 0                                                | 0                           |
| Insulins                     | 8 (3.2)                                          | 3 (1.2)                     | 4 (4.0)                                          | 2 (2.0)                     | 4 (4.1)                                          | 4 (4.1)                     |
| GLP-1 analogs                | 2 (0.8)                                          | 0                           | 0                                                | 0                           | 2 (2.0)                                          | 0                           |
| Other                        | 2 (0.8)                                          | 2 (0.8)                     | 0                                                | 0                           | 0                                                | 0                           |
| Metformin                    | 1 (0.4)                                          | 1 (0.4)                     | 0                                                | 0                           | 1 (1.0)                                          | 0                           |
| Alpha glucosidase inhibitors | 1 (0.4)                                          | 1 (0.4)                     | 0                                                | 0                           | 0                                                | 0                           |
| Thiazolidinediones           | 1 (0.4)                                          | 1 (0.4)                     | 1 (1.0)                                          | 0                           | 7 (7.1)                                          | 7 (7.1)                     |

\*Includes all patients randomized to oral semaglutide at baseline (week 0).

†Includes all patients previously randomized to sitagliptin at baseline (week 0) and rerandomized to either oral semaglutide or sitagliptin at the start of the extension phase (week 52).

‡Additional glucose-lowering medication: defined as glucose-lowering medication (or a dose increase >20% of concomitant glucose-lowering medication) given to the subject after randomization (week 0) for the durability part or after rerandomization (week 52) for the switch part, and before the planned end-of-treatment visit. Rescue medication: a subset of additional glucose-lowering medication and defined as glucose-lowering medication given as add-on to study drug (i.e. before the last day on study drug).

DPP-4, dipeptidyl peptidase-4; GLP-1, glucagon-like peptide-1; SGLT-2, sodium-glucose co-transporter 2.

**Online Supplemental Table 2** Supportive secondary endpoints not reported in the main text for the durability part (weeks 0 to 104)

|                                                    | Oral semaglutide (n=253)    |                                                |
|----------------------------------------------------|-----------------------------|------------------------------------------------|
|                                                    | In-trial observation period | On-treatment without rescue observation period |
| <b>Fasting plasma glucose, mmol/L</b>              |                             |                                                |
| <i>Week 52*</i>                                    |                             |                                                |
| n                                                  | 182                         | 175                                            |
| Observed mean change from baseline (SD)            | -2.59 (2.15)                | -2.51 (2.12)                                   |
| <i>Week 104</i>                                    |                             |                                                |
| n                                                  | 178                         | 148                                            |
| Observed mean change from baseline (SD)            | -2.19 (2.84)                | -2.12 (2.32)                                   |
| <b>Body weight, %</b>                              |                             |                                                |
| <i>Week 52*</i>                                    |                             |                                                |
| n                                                  | 185                         | 178                                            |
| Observed mean change from baseline (SD)            | -3.06 (4.26)                | -3.11 (4.29)                                   |
| <i>Week 104</i>                                    |                             |                                                |
| n                                                  | 180                         | 154                                            |
| Observed mean change from baseline (SD)            | -4.03 (5.75)                | -4.36 (5.98)                                   |
| <b>BMI, kg/m<sup>2</sup></b>                       |                             |                                                |
| <i>Week 52*</i>                                    |                             |                                                |
| n                                                  | 185                         | 178                                            |
| Observed mean change from baseline (SD)            | -1.0 (1.4)                  | -1.0 (1.4)                                     |
| <i>Week 104</i>                                    |                             |                                                |
| n                                                  | 180                         | 154                                            |
| Observed mean change from baseline (SD)            | -1.3 (1.9)                  | -1.4 (2.0)                                     |
| <b>Waist circumference, cm</b>                     |                             |                                                |
| <i>Week 52*</i>                                    |                             |                                                |
| n                                                  | 183                         | 176                                            |
| Observed mean change from baseline (SD)            | -2.5 (5.3)                  | -2.4 (5.4)                                     |
| <i>Week 104</i>                                    |                             |                                                |
| n                                                  | 178                         | 152                                            |
| Observed mean change from baseline (SD)            | -2.5 (6.3)                  | -3.0 (6.3)                                     |
| <b>HbA<sub>1c</sub> &lt;7.0% (&lt;53 mmol/mol)</b> |                             |                                                |
| <i>Week 52*</i>                                    |                             |                                                |

|                                                                                                                                                   | Oral semaglutide (n=253)    |                                                |
|---------------------------------------------------------------------------------------------------------------------------------------------------|-----------------------------|------------------------------------------------|
|                                                                                                                                                   | In-trial observation period | On-treatment without rescue observation period |
| n                                                                                                                                                 | 183                         | 177                                            |
| Observed proportion achieving outcome, n (%)                                                                                                      | 115 (62.8)                  | 114 (64.4)                                     |
| <i>Week 104</i>                                                                                                                                   |                             |                                                |
| n                                                                                                                                                 | 180                         | 150                                            |
| Observed proportion achieving outcome, n (%)                                                                                                      | 101 (56.1)                  | 91 (60.7)                                      |
| <b>HbA<sub>1c</sub> ≤6.5% (&lt;48 mmol/mol)</b>                                                                                                   |                             |                                                |
| <i>Week 52*</i>                                                                                                                                   |                             |                                                |
| n                                                                                                                                                 | 183                         | 177                                            |
| Observed proportion achieving outcome, n (%)                                                                                                      | 65 (35.5)                   | 64 (36.2)                                      |
| <i>Week 104</i>                                                                                                                                   |                             |                                                |
| n                                                                                                                                                 | 180                         | 150                                            |
| Observed proportion achieving outcome, n (%)                                                                                                      | 63 (35.0)                   | 59 (39.3)                                      |
| <b>Body weight loss ≥5%</b>                                                                                                                       |                             |                                                |
| <i>Week 52*</i>                                                                                                                                   |                             |                                                |
| n                                                                                                                                                 | 185                         | 178                                            |
| Observed proportion achieving outcome, n (%)                                                                                                      | 49 (26.5)                   | 48 (27.0)                                      |
| <i>Week 104</i>                                                                                                                                   |                             |                                                |
| n                                                                                                                                                 | 180                         | 154                                            |
| Observed proportion achieving outcome, n (%)                                                                                                      | 64 (33.9)                   | 58 (37.7)                                      |
| <b>HbA<sub>1c</sub> &lt;7.0% (&lt;53 mmol/mol) without severe or BG-confirmed symptomatic hypoglycemic episodes† and without body weight gain</b> |                             |                                                |
| <i>Week 52*</i>                                                                                                                                   |                             |                                                |
| n                                                                                                                                                 | 183                         | 177                                            |
| Observed proportion achieving outcome, n (%)                                                                                                      | 90 (49.2)                   | 89 (50.3)                                      |
| <i>Week 104</i>                                                                                                                                   |                             |                                                |
| n                                                                                                                                                 | 180                         | 150                                            |
| Observed proportion achieving outcome, n (%)                                                                                                      | 73 (40.6)                   | 67 (44.7)                                      |
| <b>HbA<sub>1c</sub> &lt;7.0% (&lt;53 mmol/mol) or HbA<sub>1c</sub> reduction ≥1% point (&lt;10.9 mmol/mol)</b>                                    |                             |                                                |
| <i>Week 52*</i>                                                                                                                                   |                             |                                                |
| n                                                                                                                                                 | 183                         | 177                                            |
| Observed proportion achieving outcome, n (%)                                                                                                      | 155 (84.7)                  | 154 (87.0)                                     |

|                                              | Oral semaglutide (n=253)    |                                                |
|----------------------------------------------|-----------------------------|------------------------------------------------|
|                                              | In-trial observation period | On-treatment without rescue observation period |
| Week 104                                     |                             |                                                |
| n                                            | 180                         | 150                                            |
| Observed proportion achieving outcome, n (%) | 126 (70.0)                  | 113 (75.3)                                     |

\*Among patients continuing from the main phase into the extension phase.

†An episode that is severe according to the American Diabetes Association classification or BG-confirmed by a plasma glucose value <3.1 mmol/L (<56 mg/dL) with symptoms consistent with hypoglycemia.

BG, blood glucose; BMI, body mass index; HbA<sub>1c</sub>, glycated hemoglobin; n, number of patients with non-missing information; SD, standard deviation.

**Online Supplemental Table 3** On-treatment adverse events by system organ class\*

| Patients with events, n (%)                                           | Durability†<br>(weeks 0 to 104) | Switch‡<br>(weeks 52 to 104)   |                        |
|-----------------------------------------------------------------------|---------------------------------|--------------------------------|------------------------|
|                                                                       | Oral<br>semaglutide<br>(n=253)  | Oral<br>semaglutide<br>(n=100) | Sitagliptin<br>(n=97)§ |
| Any event                                                             | 215 (85.0)                      | 75 (75.0)                      | 67 (69.1)              |
| Gastrointestinal disorders                                            | 126 (49.8)                      | 41 (41.0)                      | 14 (14.4)              |
| Infections and infestations                                           | 99 (39.1)                       | 27 (27.0)                      | 26 (26.8)              |
| Musculoskeletal and connective tissue                                 | 61 (24.1)                       | 14 (14.0)                      | 19 (19.6)              |
| Nervous system disorders                                              | 57 (22.5)                       | 14 (14.0)                      | 13 (13.4)              |
| Metabolism and nutrition disorders                                    | 50 (19.8)                       | 10 (10.0)                      | 8 (8.2)                |
| Investigations                                                        | 38 (15.0)                       | 7 (7.0)                        | 8 (8.2)                |
| General disorders and administration                                  | 35 (13.8)                       | 6 (6.0)                        | 4 (4.1)                |
| Eye disorders                                                         | 28 (11.1)                       | 13 (13.0)                      | 12 (12.4)              |
| Injury, poisoning, and procedural complications                       | 26 (10.3)                       | 6 (6.0)                        | 7 (7.2)                |
| Skin and subcutaneous tissue disorders                                | 23 (9.1)                        | 7 (7.0)                        | 10 (10.3)              |
| Renal and urinary disorders                                           | 22 (8.7)                        | 2 (2.0)                        | 2 (2.1)                |
| Cardiac disorders                                                     | 17 (6.7)                        | 4 (4.0)                        | 6 (6.2)                |
| Respiratory, thoracic, and mediastinal disorders                      | 17 (6.7)                        | 5 (5.0)                        | 13 (13.4)              |
| Vascular disorders                                                    | 17 (6.7)                        | 5 (5.0)                        | 6 (6.2)                |
| Neoplasms benign, malignant, and unspecified (incl. cysts and polyps) | 15 (5.9)                        | 2 (2.0)                        | 2 (2.1)                |
| Reproductive system and breast disorders                              | 12 (4.7)                        | 2 (2.0)                        | 1 (1.0)                |
| Psychiatric disorders                                                 | 10 (4.0)                        | 2 (2.0)                        | 2 (2.1)                |
| Hepatobiliary disorders                                               | 8 (3.2)                         | 2 (2.0)                        | 2 (2.1)                |
| Ear and labyrinth disorders                                           | 7 (2.8)                         | 3 (3.0)                        | 1 (1.0)                |
| Blood and lymphatic system disorders                                  | 6 (2.4)                         | 2 (2.0)                        | 4 (4.1)                |
| Endocrine disorders                                                   | 6 (2.4)                         | 3 (3.0)                        | 2 (2.1)                |
| Immune system disorders                                               | 4 (1.6)                         | 0                              | 1 (1.0)                |
| Surgical and medical procedures                                       | 4 (1.6)                         | 1 (1.0)                        | 2 (2.1)                |
| Congenital, familial, and genetic disorders                           | 3 (1.2)                         | 0                              | 0                      |

---

|                      |         |   |         |
|----------------------|---------|---|---------|
| Social circumstances | 1 (0.4) | 0 | 1 (1.0) |
|----------------------|---------|---|---------|

\*MedDRA version 20.1.

†Patients randomized to oral semaglutide at baseline (week 0).

‡Patients previously randomized to sitagliptin at baseline (week 0) and rerandomized to either oral semaglutide or sitagliptin at the start of the extension phase (week 52).

§One patient was rerandomized to sitagliptin, but was not exposed to the study drug and was therefore included in the full analysis set for the sitagliptin group (n=98) and excluded from the safety analysis set (n=97).

MedDRA, Medical Dictionary for Regulatory Activities.

**Online Supplemental Table 4** On-treatment adverse events leading to premature trial product discontinuation

|                                             | <b>Durability* (weeks 0 to 104)</b>       |             | <b>Switch† (weeks 52 to 104)</b>          |             |                                           |             |
|---------------------------------------------|-------------------------------------------|-------------|-------------------------------------------|-------------|-------------------------------------------|-------------|
|                                             | <b>Oral semaglutide (n=253)</b>           |             | <b>Oral semaglutide (n=100)</b>           |             | <b>Sitagliptin (n=97)‡</b>                |             |
|                                             | Patients with at least one event<br>n (%) | Episodes, n | Patients with at least one event<br>n (%) | Episodes, n | Patients with at least one event<br>n (%) | Episodes, n |
| Gastrointestinal disorders                  | 15 (5.9)                                  | 20          | 4 (4)                                     | 7           | 0                                         | 0           |
| Nausea                                      | 7 (2.8)                                   | 7           | 2 (2)                                     | 2           | 0                                         | 0           |
| Diarrhea                                    | 3 (1.2)                                   | 3           | 1 (1)                                     | 1           | 0                                         | 0           |
| Abdominal pain                              | 2 (0.8)                                   | 2           | 0                                         | 0           | 0                                         | 0           |
| Abdominal pain upper                        | 2 (0.8)                                   | 2           | 2 (2)                                     | 2           | 0                                         | 0           |
| Dyspepsia                                   | 2 (0.8)                                   | 2           | 0                                         | 0           | 0                                         | 0           |
| Vomiting                                    | 2 (0.8)                                   | 2           | 1 (1)                                     | 1           | 0                                         | 0           |
| Abdominal discomfort                        | 1 (0.4)                                   | 1           | 0                                         | 0           | 0                                         | 0           |
| Crohn's disease                             | 1 (0.4)                                   | 1           | 0                                         | 0           | 0                                         | 0           |
| Constipation                                | 0                                         | 0           | 1 (1)                                     | 1           | 0                                         | 0           |
| Neoplasms benign, malignant and unspecified | 5 (2.0)                                   | 5           | 0                                         | 0           | 0                                         | 0           |
| Adenocarcinoma of colon                     | 2 (0.8)                                   | 2           | 0                                         | 0           | 0                                         | 0           |
| Choroid melanoma                            | 1 (0.4)                                   | 1           | 0                                         | 0           | 0                                         | 0           |
| Hepatocellular carcinoma                    | 1 (0.4)                                   | 1           | 0                                         | 0           | 0                                         | 0           |
| Prostate cancer                             | 1 (0.4)                                   | 1           | 0                                         | 0           | 0                                         | 0           |
| Lung cancer metastatic                      | 0                                         | 0           | 1 (1)                                     | 1           | 0                                         | 0           |

|                              |          |    |       |   |   |   |
|------------------------------|----------|----|-------|---|---|---|
| Other system organ class     | 10 (4.0) | 11 | 2 (2) | 2 | 0 | 0 |
| Pancreatic enzymes increased | 1 (0.4)  | 1  | 0     | 0 | 0 | 0 |
| Weight decreased             | 1 (0.4)  | 1  | 0     | 0 | 0 | 0 |
| Decreased appetite           | 2 (0.8)  | 2  | 0     | 0 | 0 | 0 |
| Dysgeusia                    | 2 (0.8)  | 2  | 0     | 0 | 0 | 0 |
| Dizziness                    | 1 (0.4)  | 1  | 0     | 0 | 0 | 0 |
| Tachycardia                  | 1 (0.4)  | 1  | 0     | 0 | 0 | 0 |
| Fatigue                      | 1 (0.4)  | 2  | 0     | 0 | 0 | 0 |
| Pruritis                     | 1 (0.4)  | 1  | 0     | 0 | 0 | 0 |
| Eyelid edema                 | 0        | 0  | 1 (1) | 1 | 0 | 0 |
| Urticaria                    | 0        | 0  | 1 (1) | 1 | 0 | 0 |

\*Includes all patients randomized to oral semaglutide at baseline (week 0).

†Includes all patients previously randomized to sitagliptin at baseline (week 0) and rerandomized to either oral semaglutide or sitagliptin at the start of the extension phase (week 52).

‡One patient was rerandomized to sitagliptin, but was not exposed to the study drug and was therefore included in the full analysis set for the sitagliptin group (n=98) and excluded from the safety analysis set (n=97).

**Online Supplemental Table 5** On-treatment hypoglycemic episodes

|                                                           | <b>Durability* (weeks 0 to 104)</b>       |             | <b>Switch† (weeks 52 to 104)</b>          |             |                                           |             |
|-----------------------------------------------------------|-------------------------------------------|-------------|-------------------------------------------|-------------|-------------------------------------------|-------------|
|                                                           | <b>Oral semaglutide (n=253)</b>           |             | <b>Oral semaglutide (n=100)</b>           |             | <b>Sitagliptin (n=97)‡</b>                |             |
|                                                           | Patients with at least one event<br>n (%) | Episodes, n | Patients with at least one event<br>n (%) | Episodes, n | Patients with at least one event<br>n (%) | Episodes, n |
| Severe hypoglycemic episodes§                             | 0                                         | 0           | 0                                         | 0           | 0                                         | 0           |
| Severe or BG-confirmed symptomatic hypoglycemic episodes¶ | 18 (7.1)                                  | 45          | 2 (2.0)                                   | 2           | 4 (4.1)                                   | 12          |
| Nocturnal                                                 | 4 (1.6)                                   | 8           | 0                                         | 0           | 0                                         | 0           |
| Episodes in patients on SU                                | 17 (13.7)**<br>(n=124)                    | 44          | 1 (2.0)**<br>(n=51)                       | 1           | 2 (4.3)**<br>(n=47)                       | 10          |
| Episodes in patients not on SU                            | 1 (0.8)**<br>(n=129)                      | 1           | 1 (2.0)**<br>(n=49)                       | 1           | 2 (4.0)**<br>(n=50)                       | 2           |
| Hypoglycemic episodes by ADA classification††             | 58 (22.9)                                 | 328         | 9 (9.0)                                   | 43          | 13 (13.4)                                 | 52          |
| Episodes in patients on SU                                | 46 (37.1)**<br>(n=124)                    | 311         | 6 (11.8)**<br>(n=51)                      | 39          | 7 (14.9)**<br>(n=47)                      | 43          |
| Episodes in patients not on SU                            | 12 (9.3)**<br>(n=129)                     | 17          | 3 (6.1)**<br>(n=49)                       | 4           | 6 (12.0)**<br>(n=50)                      | 9           |

\*Includes all patients randomized to oral semaglutide at baseline (week 0).

†Includes all patients previously randomized to sitagliptin at baseline (week 0) and rerandomized to either oral semaglutide or sitagliptin at the start of the extension phase (week 52).

‡One patient was rerandomized to sitagliptin, but was not exposed to the study drug and was therefore included in the full analysis set for the sitagliptin group (n=98) and excluded from the safety analysis set (n=97).

---

§An episode that is severe according to ADA classification (requiring assistance from another person to actively administer carbohydrates, glucagon, or take other corrective actions).<sup>1</sup>

¶An episode that is severe according to ADA classification§ or BG-confirmed by a plasma glucose value <3.1 mmol/L (<56 mg/dL) with symptoms consistent with hypoglycemia.

\*\*Percentages relative to the total number of patients (n) within the relevant SU treatment status group.

††An episode of hypoglycemia that meets ADA classification for hypoglycemia, including episodes classified as severe hypoglycemia, documented symptomatic hypoglycemia, asymptomatic hypoglycemia, probable symptomatic hypoglycemia, pseudo-hypoglycemia, and unclassifiable (n=1, four episodes)<sup>1</sup>

ADA, American Diabetes Association; BG, blood glucose; SU, sulfonylurea.

1. Seaquist ER, Anderson J, Childs B, et al. Hypoglycemia and diabetes: a report of a workgroup of the American Diabetes Association and the Endocrine Society. *Diabetes Care* 2013;36(5):1384–95.

**Online Supplemental Table 6** EAC-confirmed events, excluding malignant neoplasms

|                                         | <b>Durability* (weeks 0 to 104)</b>       |           | <b>Switch† (weeks 52 to 104)</b>          |           |                                           |           |
|-----------------------------------------|-------------------------------------------|-----------|-------------------------------------------|-----------|-------------------------------------------|-----------|
|                                         | <b>Oral semaglutide (n=253)</b>           |           | <b>Oral semaglutide (n=100)</b>           |           | <b>Sitagliptin (n=97)‡</b>                |           |
|                                         | Patients with at least one event<br>n (%) | Events, n | Patients with at least one event<br>n (%) | Events, n | Patients with at least one event<br>n (%) | Events, n |
| <b>Deaths</b>                           |                                           |           |                                           |           |                                           |           |
| In-trial                                | 0                                         | 0         | 0                                         | 0         | 0                                         | 0         |
| <b>Acute kidney injury</b>              |                                           |           |                                           |           |                                           |           |
| On-treatment                            | 2 (0.8)                                   | 2         | 0                                         | 0         | 0                                         | 0         |
| <b>Acute pancreatitis</b>               |                                           |           |                                           |           |                                           |           |
| On-treatment                            | 0                                         | 0         | 0                                         | 0         | 0                                         | 0         |
| <b>Cardiovascular events</b>            |                                           |           |                                           |           |                                           |           |
| In-trial                                | 1 (0.4)                                   | 1         | 0                                         | 0         | 1 (1.0)                                   | 1         |
| Acute coronary syndrome                 | 1 (0.4)                                   | 1         | 0                                         | 0         | 0                                         | 0         |
| Acute myocardial infarction             | 1 (0.4)                                   | 1         | 0                                         | 0         | 0                                         | 0         |
| Cerebrovascular events                  | 0                                         | 0         | 0                                         | 0         | 0                                         | 0         |
| Heart failure requiring hospitalization | 0                                         | 0         | 0                                         | 0         | 1 (1.0)                                   | 1         |
| <b>Lactic acidosis</b>                  |                                           |           |                                           |           |                                           |           |
| On-treatment                            | 0                                         | 0         | 0                                         | 0         | 0                                         | 0         |

|                        | Durability* (weeks 0 to 104)              |           | Switch† (weeks 52 to 104)                 |           |                                           |           |
|------------------------|-------------------------------------------|-----------|-------------------------------------------|-----------|-------------------------------------------|-----------|
|                        | Oral semaglutide (n=253)                  |           | Oral semaglutide (n=100)                  |           | Sitagliptin (n=97)‡                       |           |
|                        | Patients with at least one event<br>n (%) | Events, n | Patients with at least one event<br>n (%) | Events, n | Patients with at least one event<br>n (%) | Events, n |
| Thyroid-related events |                                           |           |                                           |           |                                           |           |
| In-trial               | 0                                         | 0         | 0                                         | 0         | 0                                         | 0         |

\*Patients randomized to oral semaglutide at baseline (week 0).

†Patients previously randomized to sitagliptin at baseline (week 0) and rerandomized to either oral semaglutide or sitagliptin at the start of the extension phase (week 52).

‡One patient was rerandomized to sitagliptin but was not exposed to the study drug, and was therefore included in the full analysis set for the sitagliptin group (n=98) and excluded from the safety analysis set (n=97).

EAC, event adjudication committee.

**Online Supplemental Table 7** EAC-confirmed malignant neoplasms

|                            | <b>Durability* (weeks 0 to 104)</b>    |           |                   |                      | <b>Switch† (weeks 52 to 104)</b>       |           |                   |                      |                                        |           |                   |                      |
|----------------------------|----------------------------------------|-----------|-------------------|----------------------|----------------------------------------|-----------|-------------------|----------------------|----------------------------------------|-----------|-------------------|----------------------|
|                            | <b>Oral semaglutide (n=253)</b>        |           |                   |                      | <b>Oral semaglutide (n=100)</b>        |           |                   |                      | <b>Sitagliptin (n=97)‡</b>             |           |                   |                      |
|                            | Patients with at least one event n (%) | Events, n | Events per 100 PY | Time of onset (day)§ | Patients with at least one event n (%) | Events, n | Events per 100 PY | Time of onset (day)§ | Patients with at least one event n (%) | Events, n | Events per 100 PY | Time of onset (day)§ |
| <b>Malignant neoplasm¶</b> |                                        |           |                   |                      |                                        |           |                   |                      |                                        |           |                   |                      |
| In-trial                   | 11 (4.3)                               | 12        | 2.6               |                      | 2 (2.0)                                | 2         | 1.8               |                      | 0                                      | 0         | 0                 |                      |
| Breast cancer              | 2 (0.8)                                | 2         | 0.4               | 315<br>367           | 0                                      | 0         | 0                 | -                    | 0                                      | 0         | 0                 | -                    |
| Colorectal cancer          | 2 (0.8)                                | 2         | 0.4               | 297<br>221           | 0                                      | 0         | 0                 | -                    | 0                                      | 0         | 0                 | -                    |
| Gastrointestinal cancer    | 2 (0.8)                                | 2         | 0.4               |                      | 0                                      | 0         | 0                 |                      | 0                                      | 0         | 0                 |                      |
| Liver                      | 1 (0.4)                                | 1         | 0.2               | 249                  | 0                                      | 0         | 0                 | -                    | 0                                      | 0         | 0                 | -                    |
| Stomach                    | 1 (0.4)                                | 1         | 0.2               | 330                  | 0                                      | 0         | 0                 | -                    | 0                                      | 0         | 0                 | -                    |
| Genitourinary cancer       | 0                                      | 0         | 0                 |                      | 1 (1.0)                                | 1         | 0.9               |                      | 0                                      | 0         | 0                 |                      |
| Kidney                     | 0                                      | 0         | 0                 | -                    | 1 (1.0)                                | 1         | 0.9               | 132                  | 0                                      | 0         | 0                 | -                    |
| Gynecologic cancer         | 1 (0.4)                                | 2         | 0.4               |                      | 0                                      | 0         | 0                 |                      | 0                                      | 0         | 0                 |                      |
| Ovary                      | 1 (0.4)                                | 1         | 0.2               | 697                  | 0                                      | 0         | 0                 | -                    | 0                                      | 0         | 0                 | -                    |
| Uterus                     | 1 (0.4)                                | 1         | 0.2               | 697                  | 0                                      | 0         | 0                 | -                    | 0                                      | 0         | 0                 | -                    |

|                                 | Durability* (weeks 0 to 104)           |           |                   |                      | Switch† (weeks 52 to 104)              |           |                   |                      |                                        |           |                   |                      |
|---------------------------------|----------------------------------------|-----------|-------------------|----------------------|----------------------------------------|-----------|-------------------|----------------------|----------------------------------------|-----------|-------------------|----------------------|
|                                 | Oral semaglutide (n=253)               |           |                   |                      | Oral semaglutide (n=100)               |           |                   |                      | Sitagliptin (n=97)‡                    |           |                   |                      |
|                                 | Patients with at least one event n (%) | Events, n | Events per 100 PY | Time of onset (day)§ | Patients with at least one event n (%) | Events, n | Events per 100 PY | Time of onset (day)§ | Patients with at least one event n (%) | Events, n | Events per 100 PY | Time of onset (day)§ |
| Lung and pleura cancer          | 0                                      | 0         | 0                 |                      | 1 (1.0)                                | 1         | 0.9               |                      | 0                                      | 0         | 0                 |                      |
| Lung cancer                     | 0                                      | 0         | 0                 | -                    | 1 (1.0)                                | 1         | 0.9               | 258                  | 0                                      | 0         | 0                 | -                    |
| Skin cancer                     | 2 (0.8)                                | 2         | 0.4               |                      | 0                                      | 0         | 0                 |                      | 0                                      | 0         | 0                 |                      |
| Malignant melanoma              | 1 (0.4)                                | 1         | 0.2               | 594                  | 0                                      | 0         | 0                 | -                    | 0                                      | 0         | 0                 | -                    |
| Skin cancer other than melanoma | 1 (0.4)                                | 1         | 0.2               | 254                  | 0                                      | 0         | 0                 | -                    | 0                                      | 0         | 0                 | -                    |
| Other primary site              | 1 (0.4)                                | 1         | 0.2               | 11                   | 0                                      | 0         | 0                 | -                    | 0                                      | 0         | 0                 | -                    |
| Prostate cancer                 | 1 (0.4)                                | 1         | 0.2               | 315                  | 0                                      | 0         | 0                 | -                    | 0                                      | 0         | 0                 | -                    |

\*Patients randomized to oral semaglutide at baseline (week 0).

†Patients previously randomized to sitagliptin at baseline (week 0) and rerandomized to either oral semaglutide or sitagliptin at the start of the extension phase (week 52).

‡One patient was rerandomized to sitagliptin, but was not exposed to the study drug and was therefore included in the full analysis set for the sitagliptin group (n=98) and excluded from the safety analysis set (n=97).

§Time of onset: for the durability part, trial day of onset of event according to EAC. For switch part, trial day relative to rerandomization (week 52) of onset of event according to EAC.

¶One event of malignant anorectal neoplasm in the durability part was reported after database lock; this event had onset during the trial, but was not sent for adjudication due to being reported after database lock.

EAC, event adjudication committee; PY, patient years.

**Online Supplemental Table 8** In-trial diabetic retinopathy and related complications

|                      | <b>Durability* (weeks 0 to 104)</b>       |           | <b>Switch† (weeks 52 to 104)</b>          |           |                                           |           |
|----------------------|-------------------------------------------|-----------|-------------------------------------------|-----------|-------------------------------------------|-----------|
|                      | <b>Oral semaglutide (n=253)</b>           |           | <b>Oral semaglutide (n=100)</b>           |           | <b>Sitagliptin (n=97)‡</b>                |           |
|                      | Patients with at least one event<br>n (%) | Events, n | Patients with at least one event<br>n (%) | Events, n | Patients with at least one event<br>n (%) | Events, n |
| Events               | 13 (5.1)                                  | 16        | 4 (4.0)                                   | 4         | 2 (2.1)                                   | 2         |
| Preferred terms§     |                                           |           |                                           |           |                                           |           |
| Diabetic retinopathy | 10 (4.0)                                  | 11        | 3 (3.0)                                   | 3         | 1 (1.0)                                   | 1         |
| Retinal hemorrhage   | 2 (0.8)                                   | 2         | 0                                         | 0         | 1 (1.0)                                   | 1         |
| Macular edema        | 1 (0.4)                                   | 1         | 0                                         | 0         | 0                                         | 0         |
| Retinopathy          | 1 (0.4)                                   | 1         | 0                                         | 0         | 0                                         | 0         |
| Vitreous detachment  | 1 (0.4)                                   | 1         | 1 (1.0)                                   | 1         | 0                                         | 0         |

\*Patients randomized to oral semaglutide at baseline (week 0).

†Patients previously randomized to sitagliptin at baseline (week 0) and rerandomized to either oral semaglutide or sitagliptin at the start of the extension phase (week 52).

‡One patient was rerandomized to sitagliptin, but was not exposed to the study drug and was therefore included in the full analysis set for the sitagliptin group (n=98) and excluded from the safety analysis set (n=97).

§MedDRA version 20.1.

MedDRA, Medical Dictionary for Regulatory Activities.

**Online Supplemental Table 9** Other safety assessments in the durability part (weeks 0 to 104)

|                                         | Oral semaglutide (n=253)    |                                 |
|-----------------------------------------|-----------------------------|---------------------------------|
|                                         | In-trial observation period | On-treatment observation period |
| <b>Systolic blood pressure, mm Hg</b>   |                             |                                 |
| <i>Week 52*</i>                         |                             |                                 |
| n                                       | 185                         | 185                             |
| Observed mean (SD) change from baseline | −4 (14)                     | −4 (14)                         |
| <i>Week 104</i>                         |                             |                                 |
| n                                       | 180                         | 176                             |
| Observed mean (SD) change from baseline | −3 (14)                     | −3 (14)                         |
| <b>Diastolic blood pressure, mm Hg</b>  |                             |                                 |
| <i>Week 52*</i>                         |                             |                                 |
| n                                       | 185                         | 185                             |
| Observed mean (SD) change from baseline | −1 (9)                      | −1 (9)                          |
| <i>Week 104</i>                         |                             |                                 |
| n                                       | 180                         | 176                             |
| Observed mean (SD) change from baseline | −1 (9)                      | −1 (9)                          |
| <b>Pulse rate, beats/min</b>            |                             |                                 |
| <i>Week 52*</i>                         |                             |                                 |
| n                                       | 185                         | 185                             |
| Observed mean (SD) change from baseline | 2 (9)                       | 2 (9)                           |
| <i>Week 104</i>                         |                             |                                 |
| n                                       | 180                         | 176                             |
| Observed mean (SD) change from baseline | 2 (9)                       | 2 (9)                           |
| <b>eGFR, mL/min/1.73 m<sup>2</sup></b>  |                             |                                 |
| <i>Week 52*</i>                         |                             |                                 |
| n                                       | 184                         | 184                             |
| Geometric mean (CV) ratio to baseline   | 0.99 (7.8)                  | 0.99 (7.8)                      |
| <i>Week 104</i>                         |                             |                                 |

---

|                                       | Oral semaglutide (n=253)    |                                 |
|---------------------------------------|-----------------------------|---------------------------------|
|                                       | In-trial observation period | On-treatment observation period |
| n                                     | 179                         | 170                             |
| Geometric mean (CV) ratio to baseline | 0.96 (10.4)                 | 0.97 (9.5)                      |

\*Among patients continuing from the main phase into the extension phase.

CV, coefficient of variation; eGFR, estimated glomerular filtration rate; n, number of patients contributing to the summary statistics.

**Online Supplemental Table 10** Supportive endpoints at week 104 not reported in the main text for switch part

|                                     | Treatment policy estimand |                    | Trial product estimand   |                    |
|-------------------------------------|---------------------------|--------------------|--------------------------|--------------------|
|                                     | Oral semaglutide (n=100)  | Sitagliptin (n=98) | Oral semaglutide (n=100) | Sitagliptin (n=98) |
| Body weight, %                      |                           |                    |                          |                    |
| n                                   | 100                       | 98                 | 100                      | 98                 |
| Estimated mean change from baseline | −2.9                      | −0.7               | −3.3                     | −0.8               |
| ETD (95% CI)                        | −2.1 (−3.5 to −0.7)       |                    | −2.5 (−4.1 to −1.0)      |                    |
| P value                             | 0.0036                    |                    | 0.0015                   |                    |
| BMI, kg/m <sup>2</sup>              |                           |                    |                          |                    |
| n                                   | 100                       | 98                 | 100                      | 98                 |
| Estimated mean change from baseline | −0.8                      | −0.4               | −1.0                     | −0.4               |
| ETD (95% CI)                        | −0.4 (−0.9 to 0.1)        |                    | −0.6 (−1.1 to 0.0)       |                    |
| P value                             | 0.1032                    |                    | 0.0543                   |                    |
| Waist circumference, cm             |                           |                    |                          |                    |
| n                                   | 100                       | 98                 | 100                      | 98                 |
| Estimated mean change from baseline | −1.5                      | −0.9               | −2.1                     | −0.8               |
| ETD (95% CI)                        | −0.6 (−2.0 to 0.9)        |                    | −1.3 (−3.0 to 0.3)       |                    |
| P value                             | 0.4386                    |                    | 0.1042                   |                    |

BMI, body mass index; ETD, estimated treatment difference; n, number of patients contributing to the analysis.

**Online Supplemental Table 11** Other safety assessments in the switch part (on-treatment)

|                                                   | Switch (weeks 52 to 104)    |                       |
|---------------------------------------------------|-----------------------------|-----------------------|
|                                                   | Oral semaglutide<br>(n=100) | Sitagliptin<br>(n=97) |
| Systolic blood pressure, mm Hg                    |                             |                       |
| n                                                 | 100                         | 97                    |
| Estimated mean change from baseline at week 104   | −3                          | 2                     |
| ETD (95% CI)                                      | −5 (−9 to −1)               |                       |
| P value                                           | 0.0204                      |                       |
| Diastolic blood pressure, mm Hg                   |                             |                       |
| n                                                 | 100                         | 97                    |
| Estimated mean change from baseline at week 104   | −1                          | −0                    |
| ETD (95% CI)                                      | −1 (−4 to 2)                |                       |
| P value                                           | 0.4213                      |                       |
| Pulse rate, beats/min                             |                             |                       |
| n                                                 | 100                         | 97                    |
| Estimated mean change from baseline at week 104   | 1                           | −0                    |
| ETD (95% CI)                                      | 2 (−1 to 4)                 |                       |
| P value                                           | 0.1787                      |                       |
| eGFR, mL/min/1.73 m <sup>2</sup>                  |                             |                       |
| n                                                 | 84                          | 92                    |
| Geometric mean (CV) ratio to baseline at week 104 | 0.97 (9.0)                  | 0.97 (10.2)           |

CV, coefficient of variation; eGFR, estimated glomerular filtration rate; ETD, estimated treatment difference; n, number of patients contributing to the analysis.

Online Supplemental Figure 1 Trial design

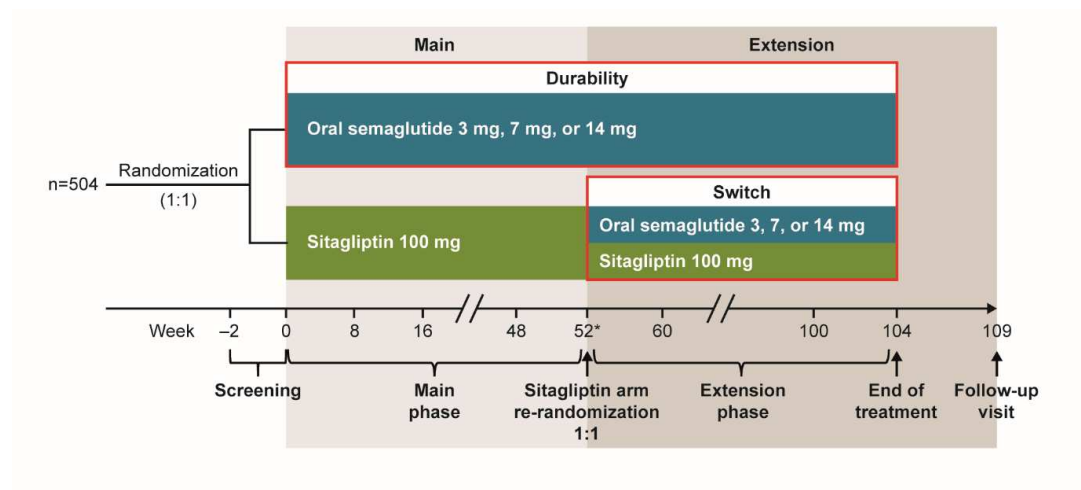

\*After 52 weeks, patients could either undergo a 5-week follow-up period and complete the trial or, after consenting, they could continue in the 52-week extension phase. The extension phase is marked in grey; the durability part (main + extension phase) and the switch part (extension phase only) are marked in red.

**Online Supplemental Figure 2 Patient disposition**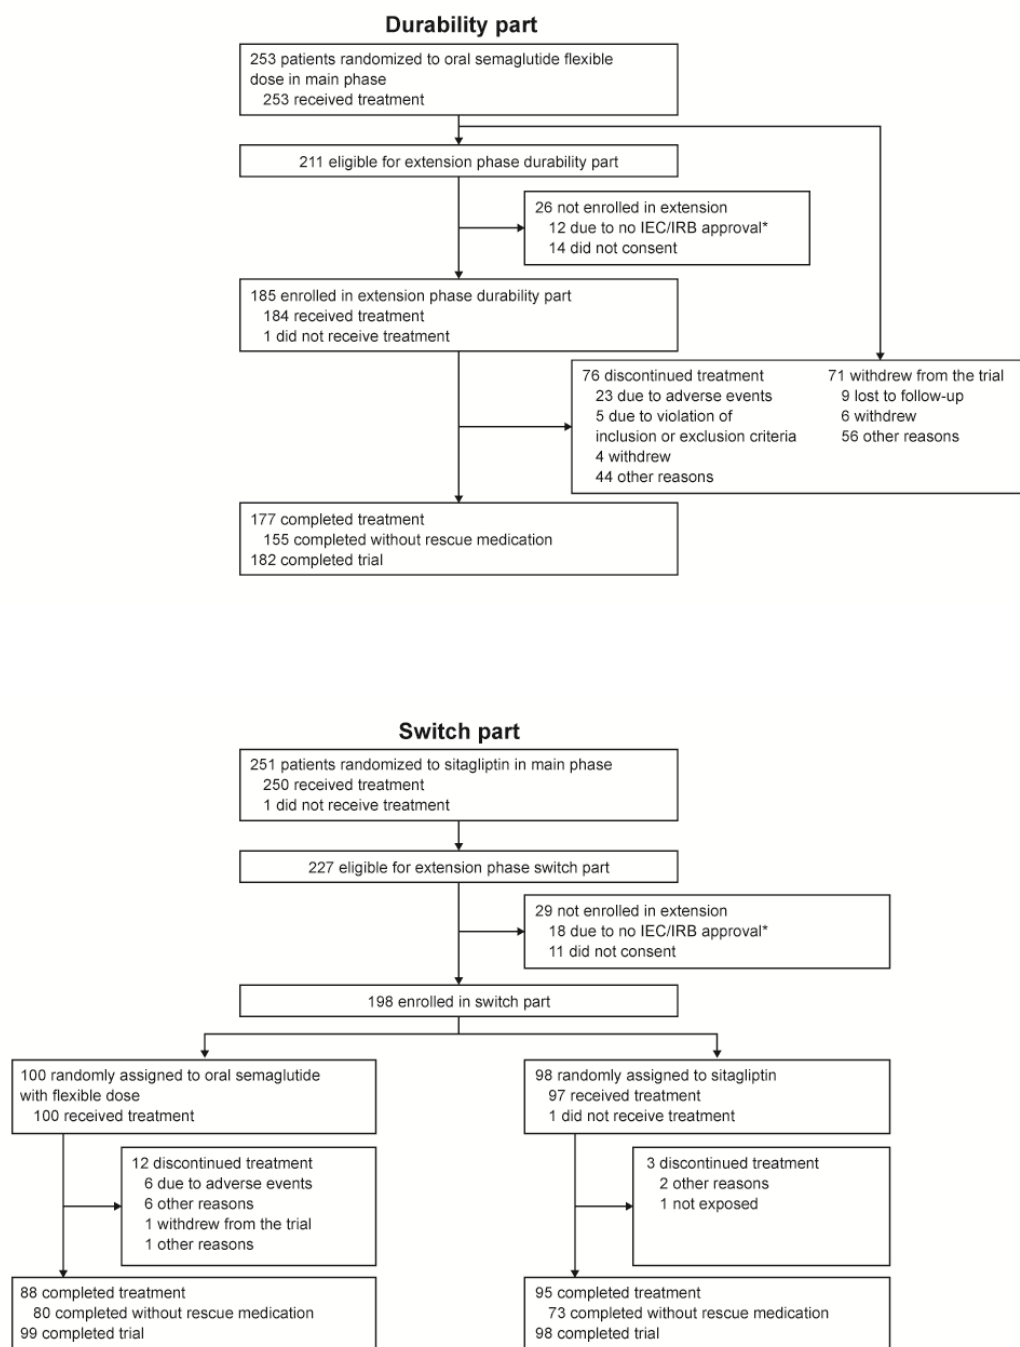

\*IEC/IRB approval was not secured in time for the start of the extension phase for the two study sites in Brazil.

IEC, Independent Ethics Committee; IRB, Institutional Review Board.

**Online Supplemental Figure 3** Oral semaglutide dose by week in the durability and switch parts. Dose levels correspond to the prescribed dose at a given week

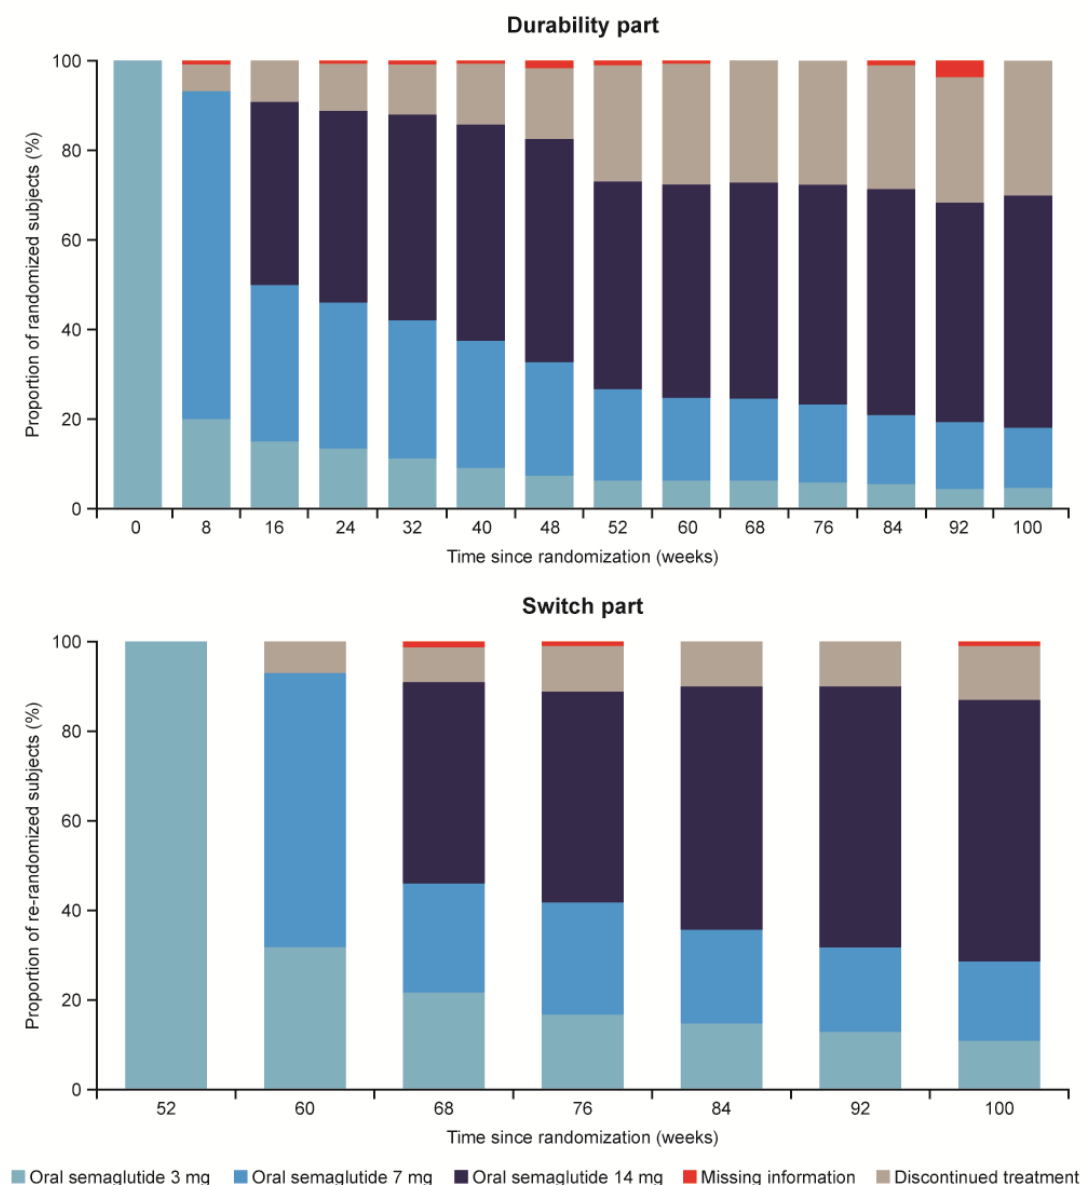

In the durability part, among the 184 patients continuing into the extension phase who were exposed to study drug at week 52, 16 were receiving oral semaglutide 3 mg, 51 were receiving oral semaglutide 7 mg, and 117 were receiving oral semaglutide 14 mg; among the 177 patients still receiving treatment at the week 100 time point, 10, 37, and 123 patients were receiving oral semaglutide 3, 7, and 14 mg, respectively.

In the switch part, of the 100 patients rerandomized to oral semaglutide at week 52, 88 patients remained on-treatment at week 100, with 13, 19, and 56 patients receiving oral semaglutide 3, 7, and 14 mg, respectively.

**Online Supplemental Figure 4** Change from week 52 in Diabetes Treatment Satisfaction Questionnaire scores at week 104 in the switch part

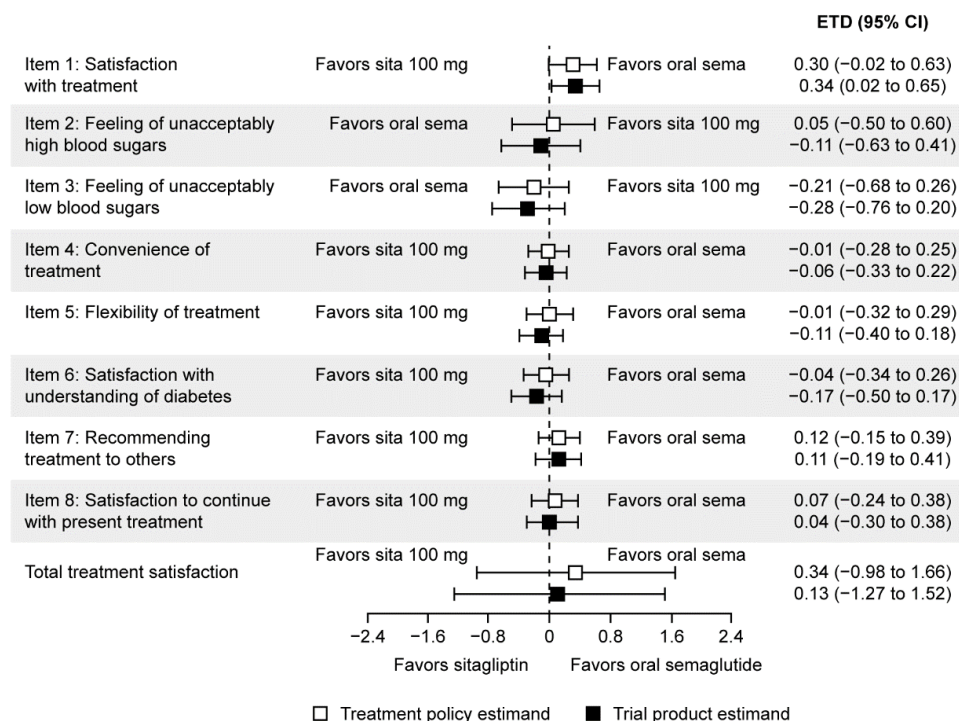

ETD, estimated treatment difference; flex, flexible dosing; sema, semaglutide; sita, sitagliptin.

---

## Trial Investigators

**Argentina:** Claudia Issa, Sanatorio Güemes, Francisco Acuña de Figueroa 1228/1240, CABA; Lucas Rista, CEDyN, Balcarce 637, Rosario; Silvia Gorban de Lapertosa, CUIFC, Sargento Cabral 2001, Corrientes.

**Austria:** Thomas Pieber, Medizinische Universität Graz, Univ. Klinik für Innere Medizin, Klinisch Abteilung für Endokrinologie und Diabetologie, Auenbruggerplatz 15, Graz; Rudolf Prager, KH Hietzing mit Neurologischem, Zentrum Rosenhügel, 3. Med. Abteilung, Pavillon 4, 2. Stock Wolkersbergenstr. 1, Wien; Evelyn Fließner-Görzer, Ordination Dr. Fließner-Görzer, Kastaniensiedlung 1, St.Stefan.

**Belgium:** Ann Mertens, UZ Leuven - Campus Gasthuisberg, Department of Endocrinology, Herestraat 49, Leuven; Ides Colin, CHR Hôpital de Warquignies, Department of Endocrinology, Rue de Chauffours 27, Boussu; Vanessa Preumont, Cliniques universitaires St. Luc, Endocrinologie et Nutrition, Avenue Hippocrate, 10, Bruxelles; André Scheen, CHU de Liège - Sart Tilman, Laboratoire de Diabétologie, Tour de Pathologie, 2ème étage, Domaine Universitaire du Sart-Tilman, Avenue de l'Hôpital 1, Liège; Guy T'Sjoen, UZ Gent, Dienst Endocrinologie, Corneel Heymanslaan 10, Gent; Luc Van Gaal, UZ Antwerpen, Dienst Endocrinologie, Diabetologie en, Metabole Ziekten, Wilrijkstraat 10, Edegem; Chris Vercammen, AZ Imelda, Dienst Endocrinologie, Imeldalaan 9, Bonheiden.

**Brazil:** Freddy Goldberg Eliaschewitz\*, CPCLIN - Centro de Pesquisas Clínicas, Rua Goiás, 193, Higienópolis, São Paulo; Luis Henrique Santos Canani\*, Centro de Pesquisas em Diabetes Ltda., Rua Gonçalves de Carvalho, 412, Bairro Floresta, Porto Alegre; Jorge Luiz Gross\*, Centro de Pesquisas em Diabetes Ltda., Rua Gonçalves de Carvalho, 412, Bairro Floresta, Porto Alegre.

**Egypt:** Samir Helmy Assaad Khalil, Alexandria CRC, New Hospital building, Faculty of Medicine, Alexandria University, 17 Champollion Street, Messallah, Alexandria; Mohamed Hesham Mohamed Fahmy El Hefnawy, National Institute of Diabetes and Endocrinology, 16 Kasr Al Ainy St., Cairo; Ibrahim Naguib El Ebrashy, Diabetes Outpatient Clinic, Kasr Elaini St. Faculty of Medicine, Cairo University, Cairo; Salah Abo Shelby, Diabetes Clinical Research Centre (DCRC), Faculty of Medicine, Ain Shams University, Cairo.

**Norway:** Hanne Løvdaal Gulseth, Aker sykehus, Oslo universitetssykehus HF, Trondheimsveien 235, Oslo; Hans Olav Høivik, M3 Helse, Storhamargata 34, Hamar; John Cooper\*, Stavanger Helseforskning, Jan Johnsensgate 5, Stavanger; Cecilie Wium, Lipidklinikken, Oslo Universitetssykehus Rikshospitalet., Forskningsveien 2B, Oslo; Frode Helland, Hallset Legesenter, Selsbakkveien 37, Trondheim.

**Republic of Korea:** Sei Hyun Baik, Korea University Guro Hospital, 148, Gurodong-ro, Guro-gu, Seoul; Kwan-Woo Lee, Ajou University Hospital, 164, World Cup-ro, Yeongtong-gu, Suwon; Ji A Seo, Korea University Ansan Hospital, 123, Jeokgeum-ro, Danwon-gu; Nan Hee Kim, Korea University Ansan Hospital, 123, Jeokgeum-ro, Danwon-gu; In Joo Kim, Pusan National University Hospital, 179 Gudeok-ro, Seo-gu, Busan; Young Min Cho, Seoul National University Hospital, 101, Daehak-ro, Jongno-gu, Seoul; Eun Seok Kang, Severance Hospital, 50-1 Yonsei-ro, Seodaemun-gu, Seoul; Choon Hee Chung, Wonju Severance Christian Hospital, 20, Ilsan-ro, Wonju, Gangwondo.

**Switzerland:** Stefan Fischli, Endokrinologie/Diabetologie, Luzerner Kantonsspital, Spitalstrasse 16, Luzern; Alain Golay\*, Service d'enseignement thérapeutique pour maladies chroniques, Hôpitaux Universitaires de Genève, Villa Soleillane 7, Chemin Venel, Genève; Cornelia Keller\*, Endokrinologie/Diabetologie, Kantonsspital Winterthur, Brauerstrasse 15, Winterthur; Markus Laimer\*, Universitätsklinik für Diabetologie, Endokrinologie und Metabolismus, Inselspital Bern, Freiburgstrasse 4, Bern; Gottfried Rudofsky, Stoffwechselzentrum, Kantonsspital Olten, Fährweg 6, Gebäude M/ Eingang Ost, Olten; Bernd Schultes, eSwiss Medical & Surgical Center, Brauerstr. 97, St.

---

---

Gallen; Simon Stäuble, MedicoPlus Health Care AG, Spitalstrasse 26a, Einsiedeln; Stefan Bilz, Kantonsspital St. Gallen, Endokrinologie/Diabetologie/Osteologie, Rorschacherstrasse 95, St. Gallen.

**Turkey:** Aytekin Oğuz, İstanbul Medeniyet Üniversitesi Göztepe EAH, Merdivenköy Polikliniği, Dahiliye ve Diyabet, Poliklinikleri No:21, Kadıköy/İstanbul; Esra Ataoglu, Haseki EAH 3.Blok Kat.2 4., Dahiliye Uzman Odası, Fatih/İstanbul; Dilek Berker, Ankara Numune Hast., C Blok, Kat.3, Endokrin Bölümü, Ankara; Ramazan Sarı, Akdeniz Üni. Tıp Fak., Hastanesi Endokrin ve Metabolizma Polikliniği H, Blok 2. Kat, Konyaaltı/Antalya; Nazire Aladağ, Kartal Eğitim Araştırma Hastanesi, Başhekimlik Binası, 1. Kat, Diyabet Polikliniği, Kartal/İstanbul; Ali Özdemir\*, Fatih Sultan Mehmet Eğitim ve Araştırma Hastanesi, Endokrinoloji Bilim Dalı, Ataşehir/İstanbul; Tamer Tetiker, Adana Çukurova Üniversitesi, Tıp Fakültesi Endokrinoloji Bilim Dalı, Zemin Kat, Balcalı/Adana; Dilek Gogas Yavuz, Fevziçakmak Mah., Muhsin Yazıcıoğlu Cad., Marmara Üni. Pendik EAH., Kat 9, Endokrinoloji Klinik Araştırma Odası, Üst, Kaynarca/Pendik; Şafak Akın, Recep Tayyip Erdoğan Üniversitesi Eğitim ve Araştırma Hastanesi, Endokrin Polikliniği, İslampaşa Mahallesi, Şehitler Caddesi No.74, Rize.

**USA:** Daniel Weiss, Your Diabetes Endocrine Nutrition Group, Inc., 8300 Tyler Blvd, Mentor, Ohio; Leslie Joseph Klaff, Rainier Clinical Research Center Inc., 723 SW 10th Street, Renton, Washington; Jeffrey Geohas, Evanston Premier Healthcare Research, LLC, 2500 Ridge Ave., Evanston, Illinois; Emily J. Morawski, Holston Medical Group, 105 West Stone Drive, Kingsport, Tennessee; Bryce A. Palchick, Preferred Primary Care Physicians, 140 Curry Hollow Rd, Pittsburgh, Pennsylvania; Debra L. Weinstein\*, Zasa Clinical Research, 8188 Jog Road, Boynton Beach, Florida; Harold Bays, L-MARC Research Center, 3288 Illinois Avenue, Louisville, Kentucky; John Bernard Buse, University of North Carolina, UNC Diabetes Care Center, 300 Meadowmont Village Circle, Chapel Hill, North Carolina; Belkis Delgado, San Marcus Research Clinic, Inc., 5941 NW 173, Miami, Florida; James C. LaRocque\*, Virginia Endocrinology Research, 3205 Churchland Blvd, Chesapeake, Virginia; William Reid Litchfield, Desert Endocrinology Clinical Research Center, 2415 West Horizon Ridge Pkwy, Henderson, Nevada; Ernie Riffer, Clinical Research Advantage, Inc./Central Phoenix Medical Clinic, LLC, 7600 North 15th Street, Phoenix, Arizona; Alexander White, Progressive Medical Research, 5111 Ridgewood Ave., Port Orange, Florida; Stephen Ong, MD Medical Research, Inc., 6357 Oxon Hill Rd, Oxon Hill, Maryland; Narendra A. Godbole, Clinical Research Advantage, Inc./Summit Medical Group Arizona, LLC, 5620 W. Thunderbird Rd, Glendale, Arizona; Louis J. Aronne, Weill Cornell Medical College, Comprehensive Weight Control Program, 1165 York Ave., New York, New York; Dan Alexandru Streja, Infosphere Clinical Studies, Inc., 15243 Vanowen Street, Van Nuys, California; Thomas Michael O'Connor, American Health Network of Indiana, LLC, 300 E Boyd Ave., Greenfield, Indiana; Ahmed A. Arif, AA MRC LLC, 1201 Flushing Road, Flint, Michigan; Bruce Bode\*, Atlanta Diabetes Associates, 1800 Howell Mill Road, Atlanta, Georgia; Mary Beth Manning, Rapid Medical Research, Inc., 3619 Park East Drive, Cleveland, Ohio; Kanagaratnam Sivalingam, First Valley Medical Group, 44725 N. 10th Street West, Lancaster, California; Edward W. Braun, Midtown Medical Center, 6919 N. Dale Mabry Hwy, Tampa, Florida; Donald C. Eagerton, Carolina Health Specialists, 945 82nd Parkway, Myrtle Beach, South Carolina; Jeanne Pereles-Ortiz, Billings Clinic Research, 1045 North 30th Street, Billings, Montana; Christopher H. Sorli, Billings Clinic Research, 1045 North 30th Street, Billings, Montana; Michael Winnie, Corpus Christi Family Wellness Center, 5920 Saratoga Blvd, Corpus Christi, Texas; Paul L. Beckett, Elite Clinical Trials, 1443 Parkway Drive, Blackfoot, Idaho; Alexander Vance Murray, PharmQuest, 806 Green Valley Road, Greensboro, North Carolina; Jonathan Condit, American Health Network of Indiana, LLC, 3631 N. Morrison Rd, Muncie, Indiana; Philip R. Nicol, The Diabetes Center, LLC, 11945 Grandhaven Dr, Murrells Inlet, South Carolina; Stephen Aronoff\*, Research Institute of Dallas, 10260 N. Central Expressway, Dallas, Texas; Mark L. Warren, Physician's East Endocrinology, 1006 WH Smith Blvd, Greenville, North Carolina; Matthew P. Finneran, Family Practice Center of Wadsworth, Inc., 251 Leatherman Road, Wadsworth, Ohio; Eileen M. Palace\*, The Center for Sexual Health, 3500 North Causeway Blvd., Metairie, Louisiana; Samuel N. Lederman, Altus Research, Inc., 4671 S. Congress Ave., Lake Worth, Florida.

---

---

\*Trial sites that were approved by independent ethics committee/institutional review board and participated in main phase but not extension phase of trial.

---

## Independent ethics committees/institutional review boards

**Argentina:** Comité de Ética e Investigación, Fundación Sanatorio Güemes, F. Acuña de Figueroa 1240 20th floor – CABA; Comité de Bioética del Instituto de Investigaciones Clínicas Rosario Paraguay 160 – Rosario; Comité Provincial de Bioética Maipú 835 2nd floor – Rosario; Comité de Bioética en Investigación de Ciencias de la Salud Moreno 1240 – Corrientes.

**Austria:** Ethikkommission der Medizinischen Universität Graz Auenbruggerplatz 2, 8036 Graz; Ethikkommission der Stadt Wien TownTown, Thomas-Kleist-Platz 8, 1030 Wien; Ethikkommission des Landes Steiermark Abt. 8, FAGP-Sanitätsdirektion, Amt der Steiermärkischen Landesregierung, Friedrichgasse 9/E/28 8010, Graz.

**Belgium:** Commissie Medische Ethiek – Toetsingscommissie, UZ Leuven - Campus Gasthuisberg, Secretariaat EC, Herestraat 49, 3000 Leuven; Comité d’Ethique CHR Mons-Hainaut - Site Saint-Joseph, Avenue Baudouin de Constantinople 5, 7000 Mons; Comité d’Ethique Hospitalo-Facultaire Cliniques universitaires Saint-Luc, Avenue Hippocrate 55, 14 Tour Harvey, niveau 0, 1200 Brussels; Comité d’Ethique Hospitalo-Facultaire Universitaire de Liège, CHU de Liège - Sart Tilman, Domaine Universitaire du Sart Tilman, Batiment B35, Avenue de l’Hôpital 1, 4000 Liège; UZ Gent Commissie voor Medische Ethiek, De Pintepark II Ingang 75 – 2e verdieping, Corneel Heymanslaan 10, 9000 Gent; Ethisch Comité UZA, UZ Antwerpen, Secretariaat Ethisch Comité, Wilrijkstraat 10, 2650 Edegem; Commissie Medische Ethiek, AZ Imelda, Imeldalaan 9, 2820 Bonheiden.

**Brazil:** Central EC: Comissão Nacional de Ética em Pesquisa (CONEP), SEPN 510 Norte, Bloco A, 3 andar, Edifício Ex-INAN, Unidade II – Ministério da Saúde Asa Norte, Brasília/DF 70750-521\*; Comitê de Ética em Pesquisa em Seres, Humanos da Irmandade da Santa Casa de Misericórdia de São Paulo, Rua Santa Isabel, 305, 4 andar Santa Cecília, São Paulo/SP 01277-900\*; Comitê de Ética em Pesquisa do Hospital Moinhos de Vento, Rua Tiradentes, 198, Subsolo, Floresta, Porto Alegre/RS 90560-030\*.

**Egypt:** Ethics Committee, Faculty of Medicine, Alexandria University; General Organization for Teaching Hospitals and Institutes (GOTHI) Research Ethics Committee; Cairo University, Faculty of Medicine Research Ethics Committee; Ain Shams University, Faculty of Medicine Research Ethics Committee (REC).

**Norway:** Regional komité for medisinsk og helsefaglig forskningsetikk, REK sør-øst B Gullhaugveien 1-3, NO-0484 Oslo.

**Republic of Korea:** Korea University Guro Hospital Institutional Review Board, 148 Gurodong-ro, Guro-gu, Seoul 08308; Ajou University Hospital Institutional Review Board, 164 World Cup-ro, Yeongtong-gu, Suwon; Korea University Ansan Hospital Institutional Review Board, 123 Jeokgeum-ro, Danwon-gu, Ansan-si, Gyeonggi-do 15355; Pusan National University Hospital Institutional Review Board, 179 Gudeok-ro, Seo-gu, Busan; Seoul National University Hospital Institutional Review Board, 101 Daehak-ro, Jongno-gu, Seoul; Severance Hospital Institutional Review Board, 50-1 Yonsei-ro, Seodaemun-gu, Seoul, 03722; Wonju Severance Christian Hospital Institutional Review Board, 20 Ilsan-ro, Wonju, Gangwondo, 26426.

**Switzerland:** Central IEC: Ethikkommission Nordwest- und Zentralschweiz (EKNZ), Hebelstrasse 53, 4056 Basel; Commission cantonale d’éthique de la recherche CCER, Rue Adrien-Lachenal 8, 1217 Genève\*; Kantonale Ethikkommission Zürich, Stampfenbachstrasse 121, 8090 Zürich\*; Kantonale Ethikkommission Bern (KEK), Hörsaaltrakt Pathologie, Eingang 43A,, Büro H372, Murtenstrasse 31, 3010 Bern\*; Ethikkommission Ostschweiz (EKOS), Kantonsspital St.Gallen, Haus 037, 9007 St.Gallen.

**Turkey:** MoH Istanbul Medeniyet University, Goztepe Training and Research Hospital, Clinical Research Ethics Committee; Marmara University Medical Faculty Clinical Research Ethics Committee.

---

---

**USA:** Sterling Institutional Review Board, 6300 Powers Ferry Road, Suite 600-351, Atlanta, GA 30339; University of North Carolina, UNC Diabetes Care Center, Office of Human Research Ethics, 720 Martin Luther King Jr. Blvd, Building #385, Second Floor, CB 7097, Chapel Hill, NC 27559-7097; Weill Cornell Medical College New York Presbyterian Institutional Review Board, 407 E. 61<sup>st</sup> Street, RR-110, New York, NY 10065.

\*Approved sites for main phase but not extension phase of trial.
